# Supplementary material for: Insights into developmental mechanisms and cancers in the mammalian intestine derived from serial analysis of gene expression and study of the hepatoma-derived growth factor (HDGF)
Source: Oxford University Press journal article supplement (doi:10.1242/dev.01579), 2004-12-17
Supplement: dev01579-sup-figs1.pdf [file dev01579-sup-figs1.pdf]

**A** MKIFSESHKT VVVVDHCPYM AESCRQHVEF DMLVKNRTQG IIP LAPISKS  
LWTCVSESSM EYCRIMYDIF PFKKLVNFIV SDSGAHLVNS WTQEDQNLQE LMAALAAVGP  
PNPRADPECC SILHGLVAAV ETLCKITEYQ HEARTLLMEN AERVGNRGRI ICITNAKSDS  
HVRMLEDCVQ ETIHEHNKLA ANSDHLMQIQ KCELVLIHTY PVGEDSLVSD RSKKELSPVL  
TSEVHVSVRAG RHLATKLNIL VQQHFDLAST TITNIPMKEE QHANTSANYD VELLHHKDAH  
VDFLKSGDSDH LGGGSREGSF KETITLKWCT PRTNNIELHY CTGAYRISPV DVNSRPSSCL  
TNFLLNGRSV LLEQPRKSGS KVISHMLSSH GGEIFLHVLS SSRSILEDPP SISEGCGGRV  
TDYRITDFGE FMRENRLTPF LDPRYKIDGS LEVPLERAKD QLEKHTRYWP MIISQTTIFN  
MQAVVPLASV IVKESLTEED VLNCQKTIYN LVDMERKNDP LPISTVGTRG KGPKRDEQYR  
IMWNELETLV RAHINNSEKH QRVLECLMAC RSKPPEEEER **KKR**GRKREDK EDKSEKAVKD  
YEQEKSWQDS ERLKGILERG KEELAEAEII KDSPDSPEPP NKKPLVEMDE TPQVEKSKGP  
VSLLSLWSNR INTANSRKHQ EFAGRLNSVN NRAELYQHLK EENGMETTKN GKASRQ

**B** MPTVVVMDVS LSMTRPVSIE GSEYQKHL AAHGLTMLFE HMATNYKLEF  
TALVVVFSSLW ELMVPFTRDY NTLQEALSNM DDYDKTCLES ALVGVCNIVQ QEWGGAIPCO  
VVLVTDGCLG IGRGSLRHSL ATQNQRSESN RFPLPFPPPS KLYIMCMANL EELQSTDSLE  
CLERLIDLNN GEGQIFTIDG PLCLKNVQSM FGKLIDLAYT PFHAVLKCGLH LTADVQVFPR  
PEPFVVDEEI DPIPKVINTD LEIVGFIDIA DISSPPVLSR HLVLPIALNK EGDEVGTGIT  
DDNEDENSAN QIAGKIPNFC VLLHGSLKVE GMVAIVQLGP EWHGMLYSQA DS**KKK**SNLMM  
SLFEPGPEPL PWLGKMAQLG PISDAKENPY GEDDNKSPFP LOPKNKRSYA QNVTVWIKPS  
GLQTDVQKIL RNARKLPEKT QTFYKELN**RL** **RKA**ALAFGFL DLLKGVADML ERECTLLPET  
AHPDAAFQLT HAAQQLKLAS TGTSEYAAYD QNITPLHTDF SGSSTERI
