# Supplementary material for: Insights into developmental mechanisms and cancers in the mammalian intestine derived from serial analysis of gene expression and study of the hepatoma-derived growth factor (HDGF)
Source: Oxford University Press journal article supplement (doi:10.1242/dev.01579), 2004-12-17
Supplement: dev01579supptables.pdf [file dev01579supptables.pdf]

**Table S2A. Information for RT-PCR analysis of human genes**

| SAGE tag   | Symbol | Gene description                                                    | Accession Number | Forward primer        | Reverse primer        | Product (bp) |
|------------|--------|---------------------------------------------------------------------|------------------|-----------------------|-----------------------|--------------|
| GTCCTTTCTG | DTR    | Diphtheria toxin receptor                                           | NM_001945        | CCACACCAAAACAAGGAGGAG | GGCACTTGAAGGCTCTGGTA  | 557          |
| TGACCAGGCG | PTH1R  | Parathyroid hormone receptor 1 *                                    | NM_000316        | TGGAATCAGACAAGGGATGG  | ATGAAGGACAGGAACAGGTG  | 505          |
| TTTTGTAGAG | TP53   | Tumor protein p53 (Li-Fraumeni syndrome)                            | XM_058834        | TGGCTCTGACTGTACCACCA  | CAGGCCCTTCTGTCTTGAAC  | 497          |
| TTTCAGGCAG | TRIP3  | Thyroid hormone receptor interactor 3 *                             | L40410           | TCAAATGTAGCACCCTCGTC  | ACCCCAAGTCTGCCGTAAAC  | 640          |
| AGTGTCTTAC | GLI    | Glioma-associated oncogene homolog (zinc finger protein)            | NM_005269        | CCAATCACAAGTCAGGTTCC  | AGAGGGAGGTGGGGTATGTC  | 365          |
| CAGGAGGAGT | GRP58  | Glucose regulated protein, 58 kDa                                   | Z49835           | TGGAATTGTCAGCCACTTGA  | CTTTGCCACCATCATTACCC  | 499          |
| TAGGTCAGGA | PTP4A3 | Protein tyrosine phosphatase type IVA, member 3 *                   | NM_032611        | CTTCCTCATCACCCACAACC  | GTCTTTGAACCGCAGCCTCT  | 433          |
| GAGGGACTCC | CHAF1B | Chromatin assembly factor 1, subunit B (p60)                        | U20980           | TCCATCACTCCTGCTGTCAA  | CACCTCCAGCTTTACCGTCT  | 401          |
| TGCCTCTGCG | CD151  | CD151 antigen                                                       | BC013302         | GAGACCATGCCTCCAACATC  | CCTTCCAACCTGCATCTGAC  | 446          |
| GATCCATAAT | PLAGL1 | Pleiomorphic adenoma gene-like 1                                    | NM_006718        | GTTTGAGGACTTGCCCTGTC  | GGCACAATACATGCAGTTCG  | 570          |
| TGCTTTGCTT | GRB10  | Growth factor receptor-bound protein 10                             | XM_033762        | GTAGCCAAAAGTCCCCTCCAC | AGACCGCTTCTTCACTCCAG  | 429          |
| CCCTGCCTTG | MDK    | Midkine (neurite growth-promoting factor 2)                         | NM_002391        | CTCAGTGCCAGGAGACCATC  | GCTTCCCAGAATCCCTTGTC  | 294          |
| GTGTGCAGGT | BRD3   | Bromodomain containing 3                                            | NM_007371        | CTCAGAATGAACTGGCTTCG  | CCAAATGACAAGGACAATGC  | 456          |
| TCCAAAGTAA | HDAC1  | Histone deacetylase 1                                               | NM_004964        | CCAGTATTCCGATGGCCTGTT | TGAAGCAACCTAACCGATCC  | 523          |
| TCTTCTCCCT | HDGF   | Hepatoma-derived growth factor (high-mobility group protein 1-like) | NM_004494        | TGGAAGACCCTGAACCAGAG  | CAGTAGACCCAGACAGCAG   | 456          |
| TCCATCGACT | LLGL1  | Lethal giant larvae homolog 1 ( <i>Drosophila</i> ) *               | D50550           | GTTACCACCCTGACCCTGCT  | GATGATGCGGGAAGTGAAGT  | 531          |
| GGGGGTAECT | FUS    | Fusion, derived from t(12;16) malignant liposarcoma                 | BC002459         | CTATGAACCCAGAGGTCGTG  | CGGCGAGTAGCAAATGAGAC  | 402          |
| CCAATAAAGT | RBP1   | Retinol binding protein 1, cellular                                 | NM_002899        | CTCCAGTCACTCCCAGAAATG | CTGATTGGTTGGGACAAGGT  | 459          |
| CTCATCAGCT | CAP    | Adenylyl cyclase associated protein                                 | NM_006367        | ACTTGGCCTGGTATTTCGATG | CGTGGTTGAGCTGATATGGA  | 532          |
| ACCGTCCACT | PPIC   | Peptidylprolyl isomerase C (cyclophilin C)                          | BC00267          | GGCCAAGGTCCTTTTGATG   | GATCGAGCAGTTGGTGATG   | 469          |
| TGTACTACTT | PAICS  | Phosphoribosylaminoimidazole carboxylase                            | X53793           | TGAGTGGTTGTCAGAGAGAG  | CTCGCAGTTTGCTCCATACC  | 464          |
| GTGTGTTTGT | TGFBI  | Transforming growth factor, beta-induced, 68 kDa                    | NM_000358        | GCGGGCTAAAGTCTCTCCAAG | GCACAAGGCTCACATCTCAT  | 438          |
| GATTTAAAGA | WSB1   | SOCS box-containing WD protein SWiP-1                               | NM_015626        | TCAGTCGGAGCCAGTAAAGC  | GAGAAGGCACAGCAAAGACC  | 389          |
| GCTTTTAGA  | HMG1   | High-mobility group nucleosome binding domain 1                     | NM_004965        | AAGGAAGAGCCCAAGAGGAG  | AGAAGGGAGACAGGGACCAC  | 307          |
| TGAGGGGTGA | GPS1   | G protein pathway suppressor 1                                      | U20285           | TCTCTGTTGATGGGCAAGG   | AGGAGGGGTCTGGGAAATG   | 443          |
| GAATAAATGT | FKBP9  | FK506 binding protein 9, 63 kDa                                     | XM_030002        | AATGCCTCACTTCTGGATGG  | GTTTGGCTTCCTGGTCTTTG  | 511          |
| ATCCGTGCC  | CALM3  | Calmodulin 3 (phosphorylase kinase, delta)                          | NM_005184        | CAATGAGGTGGATGCAGATG  | GGAAGACGTGGATGGAAGAG  | 546          |
| TACAAAATCG | IGF2   | Insulin like growth factor 2 (somatomedin A) *                      | AF217977         | CGTTGAGGAGTGCTGTTTCC  | GCCGAGGAGAGTAGCCTGTT  | 518          |
| TCATCTTCAA | CALR   | Calreticulin                                                        | XM_032020        | CACGCTTTTATGCTCTGTCTG | CTCCGTCCATCTTTCATCC   | 564          |
| TTATGGGGAG | STIP1  | Stress-induced-phosphoprotein 1 (Hsp70/Hsp90-organizing protein)    | NM_006819        | GCCTGCTACACCAAACTCCT  | GCAATCAGACCCACATCCAT  | 419          |
| ACAAATCCTT | FKBP1A | FK506 binding protein 1A, 12 kDa                                    | BC001925         | ATGCCACTTCTGTCTTCGAT  | CTCAACAGCCGCCTCAAATCT | 539          |
| CTGTCATTTG | SFRS3  | Splicing factor, arginine/serine-rich 3                             | AF107405         | GCATCGTATTCCTGTCCAT   | ACGGCTTGTGATTTCTCTCC  | 440          |
| ATATCTGTAA | DLL1   | Delta-like 1 ( <i>Drosophila</i> )                                  | AF003522         | CATCTCAGTCAGCATCATCG  | CCTCCTCTCAGCAGCATTC   | 460          |
|            |        | β-Amyloid (Loading control)                                         | NM_001642        | GGCTGTGTGTAAGCGATGA   | CATGCTGGTAATGACGGATG  | 470          |
